# Supplementary material for: A lanthanide-based ratiometric fluorescent biosensor for the enzyme-free detection of organophosphorus pesticides
Source: Royal Society of Chemistry journal article supplement (doi:10.1039/d1ay00345c), 2021-01-01
Supplement: d1ay00345c1.pdf [file d1ay00345c1.pdf]

## Supporting Information

### **A lanthanide-based ratiometric fluorescent biosensor with enzyme free for organophosphorus pesticide detection**

Tianlin Wang<sup>1,2</sup>, Yaqing Liu<sup>1,2\*</sup>

<sup>1</sup> Beijing Advanced Innovation Center for Food Nutrition and Human Health, Beijing Technology and Business University, Beijing 100037

<sup>2</sup> State Key Laboratory of Food Nutrition and Safety, College of food science and Engineering, Tianjin University of Science and Technology, Tianjin, 300457

**Table S1** DNA sequences used in the investigation

| Strand name  | DNA sequences (from 5'-terminal to 3'-terminal) |
|--------------|-------------------------------------------------|
| DNA (AS1411) | GGTGGTGGTGGTTGTGGTGGTGGTGG                      |
| DNA (T30695) | GGGTGGGTGGGTGGGT                                |
| DNA (PS2.M)  | GTGGGTAGGGCGGGTTGG                              |
| DNA (24GT)   | GGGTTTTGGGTTTTGGGTTTTGGG                        |
| DNA (21GT)   | GGGTTTGGGTTTGGGTTTGGG                           |
| DNA (20GT)   | GGGTGGGTGGGTGGGTGGGT                            |
| DNA (18GT)   | GGGTTGGGTTGGGTTGGG                              |
| DNA (TR)     | GGGTTAGGGTTAGGGTTAGGG                           |

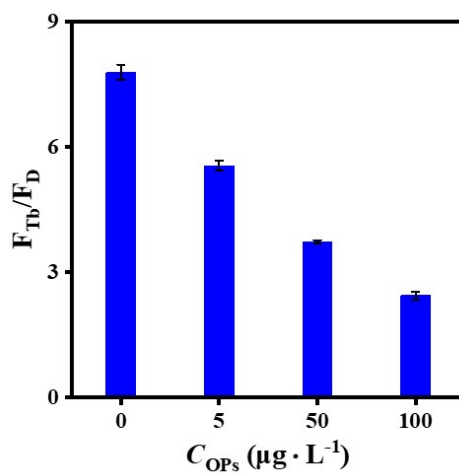

**Fig. S1.** The  $F_{Tb}/F_D$  as a function of OPs with different concentrations (0, 5  $\mu\text{g}/\text{L}$ , 50  $\mu\text{g}/\text{L}$ , 100  $\mu\text{g}/\text{L}$ ).

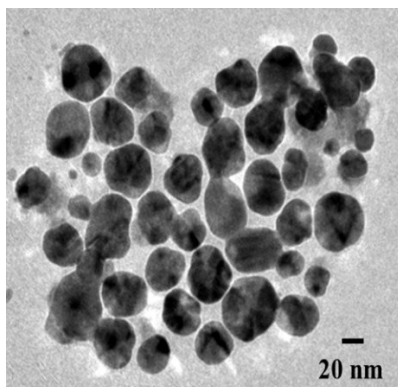

**Fig. S2.** Transmission electron micrograph of AgNPs

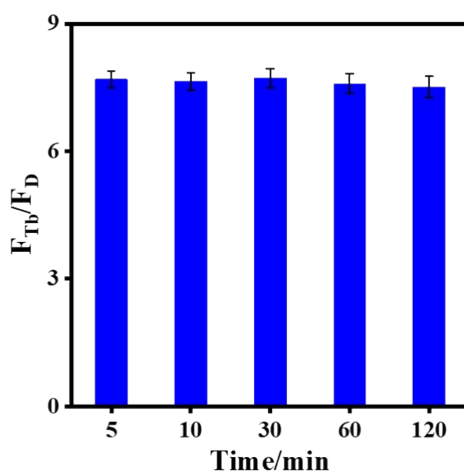

**Fig. S3.** The stability of DNA-Tb-Dured-AgNPs in the environment

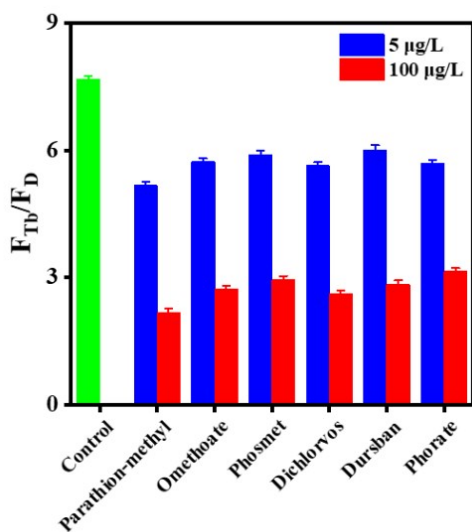

**Fig. S4.** The effect of other OPs on the fluorescence ratio ( $F_{Tb}/F_D$ ) of the Dured-DNA-Tb/AgNPs sensing system.

**Table S2** Comparison of the investigation with previous reports

| Assays      | Sensors                                    | Linear range                                     | LOD( $\mu\text{g/L}$ ) | References |
|-------------|--------------------------------------------|--------------------------------------------------|------------------------|------------|
| Fluorometry | BSPOTPE-SiO <sub>2</sub> -MnO <sub>2</sub> | 1-100 $\mu\text{g/L}$                            | 1.0                    | [1]        |
| Fluorometry | RB-Ag/Au NPs                               | 3.3-28 $\mu\text{g/L}$                           | 1.8                    | [2]        |
| Fluorometry | MnO <sub>2</sub> -AR/SC                    | 5-500 $\mu\text{g/L}$                            | 1.6                    | [3]        |
| Colorimetry | PAA-CeO <sub>2</sub>                       | 0.1-1 mg/L                                       | 26.73                  | [4]        |
| Colorimetry | AChE-TMB-H <sub>2</sub> O <sub>2</sub>     | 0.01-10 mg/L                                     | 4.0                    | [5]        |
| Colorimetry | CDs-AgNPs                                  | 0.0298-29.8<br>mg/L                              | 12                     | [6]        |
| Fluorometry | Dured-DNA-Tb/AgNPs                         | 0.03-5 $\mu\text{g/L}$<br>10-160 $\mu\text{g/L}$ | 0.034                  | This work  |

**References:**

- [1] X. Wu, P. Wang, S. Hou, P. Wu, J. Xue, *Talanta* 2019, **198**, 8-14.
- [2] Q. Luo, J. Lai, P. Qiu, X. Wang, *Sens. Actuator B* 2018, **263**, 517-523.
- [3] T. Yao, A. Liu, Y. Liu, M. Wei, W. Wei, S. Liu, *Biosens. Bioelectron.* 2019, **145**, 111705.
- [4] S. X. Zhang, S. F. Xue, J. Deng, M. Zhang, G. Y. Shi, T. S. Zhou, *Biosens. Bioelectron.* 2016, **85**, 457-463.
- [5] T. Han, G. Wang, *J. mater. Chem. B* 2019, **7**, 2613-2618
- [6] M. Zheng, C. Wang, Y. Wang, W. Wei, S. Ma, X. Sun, J. He, *Talanta* 2018, **185**, 309-315
